# Supplementary material for: Mapping of Human FOXP2 Enhancers Reveals Complex Regulation
Source: Front Mol Neurosci. 2018 Feb 21;11:47. doi: 10.3389/fnmol.2018.00047 (PMC5826363; doi:10.3389/fnmol.2018.00047)
Supplement: TABLE S4 — Chromatin conformation capture (3C) fragment interactions. [file Table_4.xlsx]

## Sheet: Sheet1
Table S4: 3C fragment interactions
3C fragment	HEK293		SK-N-MC		PFSK1		KELLY		IMR32		SH-SY5Y		SK-N-AS
	Mean interaction frequency	adjusted p-value	Mean interaction frequency	adjusted p-value	Mean interaction frequency	adjusted p-value	Mean interaction frequency	adjusted p-value	Mean interaction frequency	adjusted p-value	Mean interaction frequency	adjusted p-value	Mean interaction frequency	adjusted p-value
-106.682	1	1	0.818766	0.451791	0.801972	0.225206	0.857039	0.767118	1.43496	1.70752e-06	1.65077	0.0583849	1.03109	0.902911
-74.088	0.60639	0.191327	0.54908	0.156538	0.454488	0.0816998	0.541532	0.553971	0.625919	0.361225	0.473405	0.0808719	0.502618	0.237408
-68.13	2.128	0.790781	1.62552	0.971985	0.876716	0.656272	0.0573385	0.600072	1.23603	0.779322	1.03707	0.603561	2.34049	0.768234
-59.323	3.98984	0.123465	2.84349	0.00432614	0.992301	0.4608	0.803958	0.94475	1.44573	0.0925974	0.783023	0.799685	1.47639	0.0580685
-39.46	15.6908	0.0549899	15.9488	3.34873e-06	10.0087	0.00572389	3.79825	0.69738	4.06384	0.00236338	9.88146	0.00144033	10.93	0.0219713
-37.989	0.554622	0.118255	1.89661	0.0232143	0.523014	0.107741	0.0700209	0.021246	0.42706	0.0606536	0.399502	0.052163	0.692841	0.398269
-36.643	53.6419	0.00319211	21.5455	0.00696789	12.0961	0.00226709	0.827863	0.511412	16.8104	0.000179274	16.3524	9.59184e-06	15.6874	0.00352212
-19.468	0.93539	0.747735	1.62884	0.245412	0.901516	0.662257	0.849297	0.931956	0.808402	0.413551	0.781537	0.396802	0.914701	0.791447
-18.178	0.622389	0.414629	1.91146	0.548172	0.552198	0.395327	0.868771	0.887073	0.630566	0.457832	0.613469	0.3844	0.915963	0.742609
-15.497	4.40232	0.0579907	5.46268	0.0229514	4.34194	0.109084	3.87292	0.912713	5.76277	0.121866	5.13118	0.0114509	4.65366	0.0341432
-10.574	1	0.914001	1	0.977472	1	0.894589	1	0.959486	1	0.96711	1	0.872129	1	0.903075
-5.29	3.02371	0.787146	4.78603	0.242935	4.4675	0.366814	2.22947	0.99128	3.51953	0.624561	7.36412	0.0475881	3.66987	0.616244
13.409	3.12584	0.108156	17.8552	0.00409123	3.44255	0.115391	0.508023	0.575314	2.99022	0.256646	3.54676	0.0449447	1.97775	0.622796
16.668	0.618885	0.29266	3.05653	0.00247077	0.700672	0.485513	0.783153	0.920343	0.215288	0.0295567	0.773367	0.584793	0.676296	0.515975
25.251	1.77114	0.747012	2.76267	0.243108	3.48348	0.102004	1.96209	0.933439	1.25541	0.953604	2.99052	0.118708	3.05128	0.154435
29.285	0.862847	0.525265	1.6821	0.966426	1.86489	0.987621	2.03895	0.998018	1.15354	0.689066	1.68889	0.906686	1.52682	0.896483
38.206	0.595168	0.531201	1.6193	0.573407	0.731387	0.644631	0.802324	0.935674	0.684919	0.632806	0.712987	0.592076	0.760019	0.749562
46.347	0.933361	0.705383	1.32889	0.167424	0.948711	0.640595	0.689866	0.983641	0.49996	0.641797	1.0088	0.477562	1.07384	0.526895
53.043	10.5306	0.0624699	21.0792	0.00032411	7.68961	0.00106226	2.39501	0.630054	10.5297	0.00150759	4.67542	0.0002438	10.0129	0.0101432
70.262	5.93433	0.00196975	12.3298	0.000112803	3.10364	0.359203	12.6038	0.15622	10.3304	1.41964e-05	5.80965	0.000228289	12.4015	5.58091e-05
77.506	0.558595	0.283193	0.498107	0.235961	1.00192	0.666358	1.19807	0.980578	0.569686	0.360065	0.59559	0.310318	0.829962	0.584302
89.499	1.00118	0.579254	0.936841	0.955101	1.03505	0.64893	1.08642	0.959378	0.602002	0.285878	0.952652	0.723385	1.19012	0.52433
252.626	0.54667	0.246969	0.401015	0.166777	0.379629	0.202601	0.862488	0.88778	0.304662	0.17876	0.356799	0.136977	0.547162	0.338507
261.812	0.789976	0.475839	0.924294	0.542501	1.21387	0.676608	1.03959	0.882034	0.416021	0.349313	0.732031	0.401915	1.91143	0.894917
272.38	7.26689	0.0319164	2.55744	0.322392	1.97924	0.632826	1.50529	0.984934	3.10369	0.276116	2.56959	0.268889	4.80578	0.0901198
307.784	1.60046	0.934119	3.04786	0.235828	0.807871	0.651226	0.912116	0.912312	1.35127	1.00032	0.550824	0.440786	1.19394	0.915648
329.237	9.22268	0.000267686	13.7714	0.000346307	1.99012	0.549659	2.2211	0.611137	1.21968	1.04853	1.541	0.740637	0.0770807	0.398571
330.059	45.2821	0.00485851	65.2588	0.000537197	8.56157	0.109663	1	1	1	1	2.017	0.40488	12.0342	0.0593378
335.049	2.97436	0.0478643	3.65287	0.000562632	0.98149	0.906488	1.02462	0.973216	1.23031	0.557894	0.340577	0.0486202	1.05844	0.811583
342.481	0.69949	0.146236	1.13645	0.30181	0.19019	0.00365656	0.242039	0.0088964	0.133552	0.000763265	0.156662	0.00114292	0.812516	0.587227
346.177	32.8167	0.00157019	62.2914	0.01682	12.7735	0.0522448	34.6329	1.13531e-06	36.882	0.0255411	8.97135	0.000821399	39.0355	0.028272
353.463	5.24066	0.00300672	6.78523	0.0336879	2.05195	0.0679297	1.15645	0.816782	3.38752	0.247899	1.36542	0.149857	3.48836	0.00014867
603.51	60.1504	0.003552	0.00369547	1.76765e-23	9.88392	0.00801385	29.6448	0.69738	3.24375	0.34869	11.6017	8.58378e-06	14.7761	0.0115051
621.15	39.5465	0.00971659	0.667844	0.255706	3.94145	0.0145551	0.692707	0.69738	1	1	6.34712	0.0479739	9.57431	0.0270792
633.069	4.69613	0.127644	3.8517	0.131784	1.07965	0.792721	1	0.935539	2.19708	0.738132	0.622911	0.534814	3.33763	0.575858
706.131	7.93971	0.00126074	16.2572	0.00242915	0.877634	0.365294	0.667405	0.547941	9.80858	9.03221e-06	2.42071	0.273971	1	1
736.883	0.152412	0.0157078	0.334472	0.0329151	0.217272	0.0374846	0.136627	0.0541716	0.255032	0.0897963	0.158786	0.0195505	0.42723	0.0867619
752.325	0.417298	0.330239	0.540912	0.552498	0.579099	0.646988	0.613504	1.00202	0.511176	0.634985	0.142193	0.0927819	0.815852	0.890953
772.183	32.4074	3.18215e-06	1	1	2.80244	0.359759	0.825644	0.852353	21.2698	4.93393e-12	5.80441	0.0534197	10.2869	0.000367256
808.691	0.696633	0.532142	1.00998	0.895187	0.467152	0.400299	0.98639	0.984269	0.633072	0.56834	0.506341	0.382241	0.858901	0.804718
822.943	0.423184	0.145635	0.231596	0.0452565	0.165478	0.0610211	0.77346	0.783008	0.277989	0.0905352	0.181468	0.0478359	0.514838	0.353233
842.633	67.3927	0.000467641	83.2779	1.6831e-08	19.3005	0.00715992	7.78801	0.743236	1	0.671734	22.331	0.00101505	29.0626	0.0327001
864.362	1.36551	0.330341	0.967556	0.808755	0.381284	0.365691	0.40515	0.753248	0.551887	0.631071	0.292439	0.227834	1.35315	0.280236
1386.46	0.302941	0.118151	0.298308	0.130317	0.253336	0.236151	0.840635	0.813149	0.270181	0.258686	0.30917	0.122121	0.49818	0.334183
1391.17	1	1	1	1	1	1	1	1	1	1	1.94142	0.0686544	1	1
