# Supplementary material for: Mapping of Human FOXP2 Enhancers Reveals Complex Regulation
Source: PubMed Central journal article supplement (PMC5826363; doi:10.3389/fnmol.2018.00047), 2018-02-21
Supplement: Table_1.pdf [file Table_1.pdf]

**Table S1: ChIP-qPCR Primers**

| ID              | Forward primer           | Reverse primer              |
|-----------------|--------------------------|-----------------------------|
| 1               | GTTCAAGTTGGCCGTTCTTTC    | TGAAACTTTCCTCCAAATAGCTG     |
| 2               | GCGAGCAGTGTGTGTACAGTTC   | GTGTGTCTGTGTGTGAATGTG       |
| 3               | TGGCCTGGTTTTACTTTTTATTCC | AGGTAACAGCCAAGTGAGAAGC      |
| 4               | AAGGTGAAATGTGAAATTTGCTG  | ACATCTGCCACTACTTTTTGTTGC    |
| 5               | TGGTGCTTTTGTCTCTCTCTC    | GGTGACAAAGGTTCAAGACTGAG     |
| 6               | AGCTTGGCTGGGCTATAAATTAC  | GTCATCAGGCAATTACTGTAGCC     |
| 7               | TTGCAAGTCCTGTAATGATGATG  | GTGATATTGAAACAGCCCAATC      |
| 8               | TGTATTTAGTGTTTGTGTGCATCG | AATGCAAGCTTCCTATCTCTTCC     |
| 9               | GATTAGCATCTGGATGAAAGCTG  | ACACGTTACACCTTCACACTTCC     |
| 10              | AAGTTAAAGCAAATGCCACAC    | GATTATTCTTGAAAACAATGCCTAAAG |
| GAPDH promoter  | CGGCTACTAGCGTTTTACG      | GCTGCGGGCTCAATTTATAG        |
| Myoglobin Exon2 | CAGACGTTCCAGCACCAACTG    | ACCCAGTGAGCCCATACTTG        |
