# Supplementary material for: Mapping of Human FOXP2 Enhancers Reveals Complex Regulation
Source: PubMed Central journal article supplement (PMC5826363; doi:10.3389/fnmol.2018.00047), 2018-02-21
Supplement: Table_2.pdf [file Table_2.pdf]

**Table S2: Primers used for 3C-qPCR**

| Chromosome | Start [hg19] | End [hg19] | 3C fragment  | Sequence                   |
|------------|--------------|------------|--------------|----------------------------|
| chr7       | 113619659    | 113619682  | -107         | TTCTTTTCAGTACCACTGCTAGGTTG |
| chr7       | 113652257    | 113652276  | -74          | TTCTCTCCCCTCCCCATATC       |
| chr7       | 113658218    | 113658234  | -68          | CCACATGGGAGGAGCAAG         |
| chr7       | 113667023    | 113667041  | -59          | CCCCATTAAATGCTTGCAAG       |
| chr7       | 113686885    | 113686904  | -39          | GTTCCCTTTTCTGGCAGGATG      |
| chr7       | 113688356    | 113688375  | -38          | CAATGCCTTGGTCATTGTTG       |
| chr7       | 113689702    | 113689721  | -37          | CACACTGATGGATGGCTCAC       |
| chr7       | 113706877    | 113706896  | -19          | GCAAGCCAAAATTCCAATC        |
| chr7       | 113708164    | 113708186  | -18          | TTGCTCATAGACACAAATCAAGG    |
| chr7       | 113710846    | 113710867  | -15          | AAAACCAGGAAACTGACATTGG     |
| chr7       | 113715771    | 113715790  | -11          | GGGTCTGCTTCCAAGTTCAG       |
| chr7       | 113721054    | 113721074  | -5           | TCTTGATCAGGAAATCCAC        |
| chr7       | 113732140    | 113732161  | Anchor point | TGAAAAGCACATTGCTGTGAAG     |
| chr7       | 113739754    | 113739773  | 13           | CTCCCTTGGACACCAGAATC       |
| chr7       | 113743011    | 113743032  | 17           | TTGTTCACTGCTTACTTTTGG      |
| chr7       | 113751593    | 113751615  | 25           | AAGGGAAGTTATCCAGCTACAGG    |
| chr7       | 113755630    | 113755649  | 29           | GCCAGGAATATTGGCTGTTG       |
| chr7       | 113764551    | 113764570  | 38           | TCCAATGGTGCTCACAAAAG       |
| chr7       | 113772692    | 113772711  | 46           | TAGATGGAATGGCCAGGAAG       |
| chr7       | 113779379    | 113779407  | 53           | GTTGTTTTCGGGGAGGTTG        |
| chr7       | 113796607    | 113796626  | 70           | CCACCTTTCAAGACCAGACC       |
| chr7       | 113803849    | 113803870  | 78           | CTGGAATGTTACCTAGGGCATC     |
| chr7       | 113815841    | 113815863  | 89           | CGATTCTTCCCTGTAGAATCC      |
| chr7       | 113978968    | 113978990  | 253          | TTCCATGCTCTGGAGATTAAC      |
| chr7       | 113988151    | 113988176  | 262          | GAGAATTACGTGGTAAATCACAGTTG |
| chr7       | 113998725    | 113998744  | 272          | AGAGACTGGAGGCATTTTGC       |
| chr7       | 114034128    | 114034148  | 308          | TCCAAAAGCAATTAGCACACC      |
| chr7       | 114055582    | 114055601  | 329          | GGGAGACCAGACACAGGAAC       |
| chr7       | 114056404    | 114056423  | 330          | TTCCAGTGACATGAGCAAG        |
| chr7       | 114061389    | 114061413  | 335          | TTTCATTGGCTTACTTATGTTTCC   |
| chr7       | 114068822    | 114068845  | 342          | TGATGCAGTTATTGCCTTAATTC    |
| chr7       | 114072519    | 114072541  | 346          | AACTAAGGTTTTGCAGCTGACTG    |
| chr7       | 114079808    | 114079827  | 353          | ATGTGGAGACAGGTTTTTGG       |
| chr7       | 114329855    | 114329874  | 604          | GGAAGAGCCAGTGATTGCAG       |
| chr7       | 114329855    | 114329874  | 621          | TTGAAAGGGCTACAGTGACA       |
| chr7       | 114329855    | 114329874  | 633          | CACCCATTTCTCTTTTTCCA       |
| chr7       | 114432476    | 114432495  | 706          | GAAGTTGACCCACCACTCCA       |
| chr7       | 114463228    | 114463247  | 737          | TGGGCCTCTGTTGTCTCAGT       |
| chr7       | 114478670    | 114478689  | 752          | GCAGAACAAGGGTGGACAAA       |
| chr7       | 114498528    | 114498547  | 772          | AGCTTTTCTGGGGAGCTGAC       |
| chr7       | 114535036    | 114535055  | 809          | TCCTTTAGCGCTGCTCTGAT       |
| chr7       | 114549286    | 114549307  | 823          | CAAGCATTTGTCCTTTCTTTGA     |
| chr7       | 114568978    | 114568997  | 843          | CAGCTGTGAGAACCCTGAG        |
| chr7       | 114590707    | 114590726  | 864          | CAGGGGAGGTAAGGCTCAA        |
| chr7       | 115112801    | 115112820  | 1386         | CACAAGGGCCCAAGTTACAA       |
| chr7       | 115117519    | 115117538  | 1391         | GGAGATCCCGAGAAAAGCTC       |
