# Supplementary material for: Mapping of Human FOXP2 Enhancers Reveals Complex Regulation
Source: PubMed Central journal article supplement (PMC5826363; doi:10.3389/fnmol.2018.00047), 2018-02-21
Supplement: Table_3.pdf [file Table_3.pdf]

**Table S3: Primers used to clone promoter and enhancer regions**

| Reg. Element | Orientation | Start [hg19] | End [hg19] | Sequence                              |
|--------------|-------------|--------------|------------|---------------------------------------|
| TSS1         | Forward     | 113724817    | 113724838  | ATCAGAGCTCGTTCAAGTTGGCCGTTCTTTCC      |
|              | Reverse     | 113726588    | 113726609  | ATCACTCGAGAAGCCCCCAACACACACC          |
| TSS2         | Forward     | 114051220    | 114051242  | ATCAGAGCTCCTCACATCGCCAAAGGTATACC      |
|              | Reverse     | 114055298    | 114055324  | ATCACTCGAGGCACAGAAAACAGTATAAAAAGAAGGG |
| TSS3         | Forward     | 114055454    | 114055475  | ATCAGAGCTCTAGAGAGGGGTGGGATTTTACG      |
|              | Reverse     | 114056438    | 114056459  | ATCACTCGAGGGTCAGAGGAAAAAGCTGTTGG      |
| Element 37   | Forward     | 113688009    | 113688029  | ATCAGGTACCCACAGGGGAACCTCTGCAAAACTGC   |
|              | Reverse     | 113475999    | 113476018  | ATCACTCGAGCACAATTTGTGGTGGGTGGGTGGG    |
| Element 330  | Forward     | 114056847    | 114056867  | ATCAGGTACCGGTTTTTCACGGAAAGCAGAGT      |
|              | Reverse     | 114058626    | 114058647  | ATCAGAGCTCGACGTCTGTTCTGTGAGTTTCC      |
| Element 815  | Forward     | 114541369    | 114541389  | ATCAGGTACCAGTATTGGCACCCAGCAA          |
|              | Reverse     | 114542182    | 114542201  | ATCAGAGCTCTGTTCTAGGCGTGTCTGTG         |
| Element 843  | Forward     | 114568454    | 114568473  | ATCAGGTACCAGTGTGATGGCAGAACATGG        |
|              | Reverse     | 114572392    | 114572411  | ATCACTCGAGACAACCTCCCAATTTCTCGC        |
